# Supplementary material
Source: MDPI journal article supplement (https://www.mdpi.com/2504-477X/8/10/397)
Supplement: s1 [file jcs-3164313-supplementary.pdf › jcs-3164313-supplementary.pdf]

## Supporting Information

# Nitrogen-Doped Borophene Quantum Dots: A Novel Sensing Material for Detection of Hazardous Environmental Gases

Kriengkri Timsorn <sup>1</sup> and Chatchawal Wongchoosuk <sup>2,\*</sup>

<sup>1</sup> Division of Physics, Faculty of Science and Technology, Phetchabun Rajabhat University, Phetchabun 67000, Thailand; timsorn23@pcru.ac.th

<sup>2</sup> Department of Physics, Faculty of Science, Kasetsart University, Chatuchak, Bangkok 10900, Thailand; chatchawal.w@ku.ac.th

\* Correspondence: chatchawal.w@ku.ac.th; Tel.: +662-562-5555

**Table S1:** Typical calculated adsorption parameters for each gas molecule absorbed on the B<sub>9</sub><sup>-</sup> BQD structures with bridge and hollow sites.

| System                                        | Adsorption sites | Distance (Å) | E <sub>ad</sub> (eV) | Q (e)  | E <sub>HOMO</sub> (eV) | E <sub>LUMO</sub> (eV) | E <sub>g</sub> (eV) |
|-----------------------------------------------|------------------|--------------|----------------------|--------|------------------------|------------------------|---------------------|
| B <sub>9</sub> <sup>-</sup> - NO <sub>2</sub> | bridge           | 1.23         | -5.66                | -0.009 | -6.11                  | -5.04                  | 1.07                |
|                                               | hollow           | 1.23         | -5.66                | -0.009 | -6.11                  | -5.04                  | 1.07                |
| B <sub>9</sub> <sup>-</sup> - CO              | bridge           | 1.12         | -1.26                | 0.023  | -5.89                  | -4.95                  | 0.94                |
|                                               | hollow           | 1.12         | -0.72                | 0.341  | -5.63                  | -3.13                  | 2.50                |
| B <sub>9</sub> <sup>-</sup> - CO <sub>2</sub> | bridge           | 1.75         | -3.93                | -0.027 | -6.40                  | -4.61                  | 1.79                |
|                                               | hollow           | 1.75         | -3.05                | -0.044 | -5.70                  | -4.54                  | 1.16                |
| B <sub>9</sub> <sup>-</sup> - NH <sub>3</sub> | bridge           | 3.00         | -2.72                | 0.516  | -4.81                  | -4.49                  | 0.32                |
|                                               | hollow           | 3.00         | -1.78                | 0.420  | -5.14                  | -2.90                  | 2.24                |

**Figure S1:** Some optimized  $B_9^-$  BQDs for adsorption of (a)  $NO_2$ , (b)  $CO_2$ , (c)  $CO$  and (d)  $NH_3$  with bridge and hollow sites.

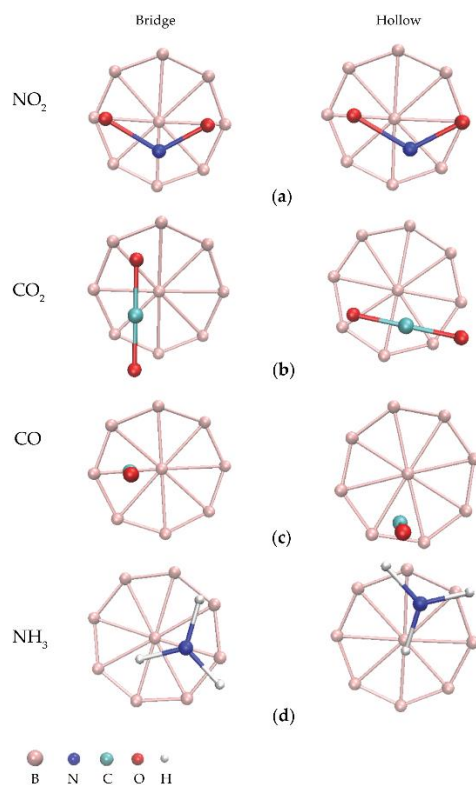

**Source Code S1:** An example of DFTB command code for full optimization.

```
Geometry = GenFormat {
<<< "1.23-A.gen"
}
Hamiltonian = DFTB {
  SCC = Yes
  SCCTolerance = 1e-6
  MaxSCCIterations = 1000
  Mixer = Broyden {}
  MaxAngularMomentum = {
    B = "p"
    N = "p"
    O = "p"
  }
  Charge = 0.0
  SpinPolarisation = {}
  Filling = Fermi {
    Temperature [K] = 300
```

```

}
Dispersion = LennardJones {
  Parameters {
    B {
      Distance [AA] = 4.083
      Energy [kcal/mol] = 0.180
    }
    N {
      Distance [AA] = 3.660
      Energy [kcal/mol] = 0.069
    }
    O {
      Distance [AA] = 3.500
      Energy [kcal/mol] = 0.060
    }
  }
}
SlaterKosterFiles = {
  B-B = "/opt/programs/DFTB+/TB-paras/matsci-0-3/B-B.skf"
  B-N = "/opt/programs/DFTB+/TB-paras/matsci-0-3/B-N.skf"
  B-O = "/opt/programs/DFTB+/TB-paras/matsci-0-3/B-O.skf"
  N-N = "/opt/programs/DFTB+/TB-paras/matsci-0-3/N-N.skf"
  N-O = "/opt/programs/DFTB+/TB-paras/matsci-0-3/N-O.skf"
  N-B = "/opt/programs/DFTB+/TB-paras/matsci-0-3/N-B.skf"
  O-O = "/opt/programs/DFTB+/TB-paras/matsci-0-3/O-O.skf"
  O-B = "/opt/programs/DFTB+/TB-paras/matsci-0-3/O-B.skf"
  O-N = "/opt/programs/DFTB+/TB-paras/matsci-0-3/O-N.skf"
}

KPointsAndWeights = SupercellFolding {
  1 0 0
  0 1 0
  0 0 1
  0.0 0.0 0.0
}
Driver = ConjugateGradient {
  LatticeOpt = Yes
  MovedAtoms = 1:-1
  MaxForceComponent = 1.0e-4
  MaxSteps = 10000
  OutputPrefix = "geo_end"
  Constraints = {}
}

```
